# Supplementary material
Source: PubMed Central journal article supplement (PMC3571091)
Supplement: NIHMS354725-supplement-1.pdf [file NIHMS354725-supplement-1.pdf]

## SUPPLEMENTAL INFORMATION

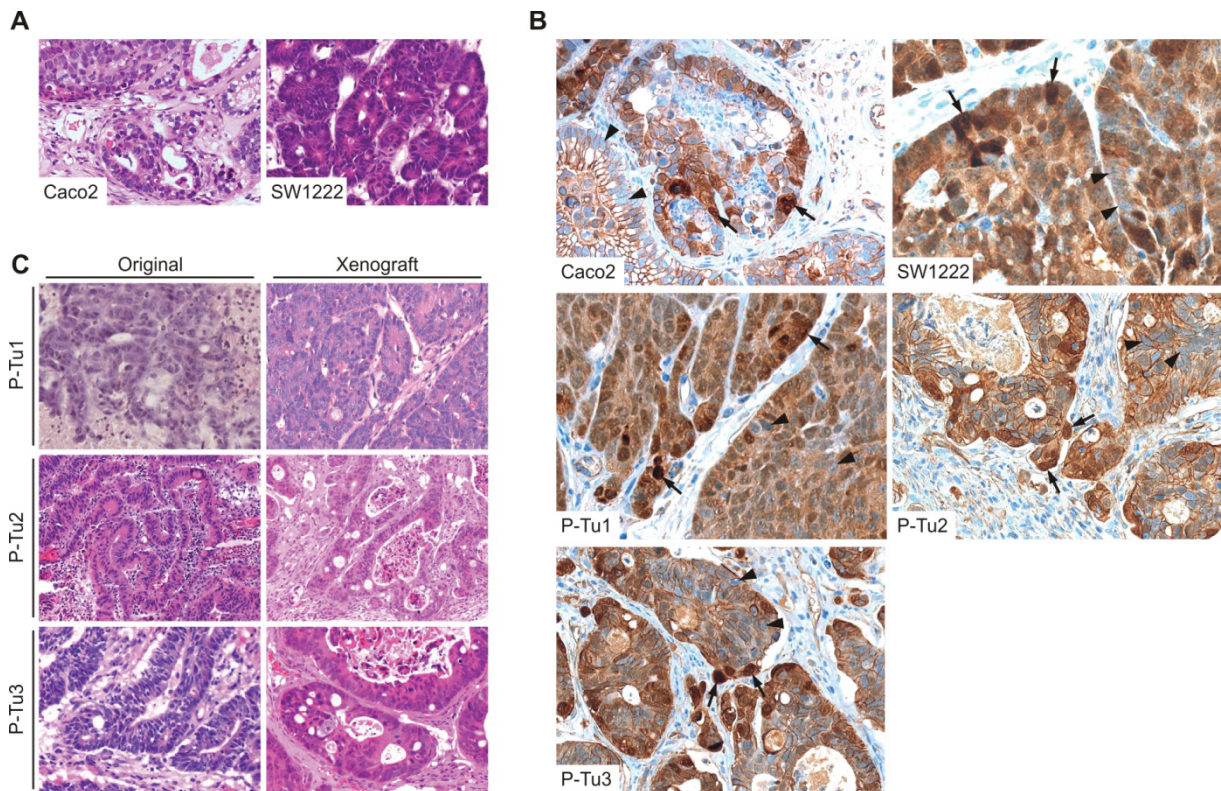

**Supplemental Figure 1.** (A) Hematoxylin and eosin (H&E)-stained sections of Caco2 (*left*) and SW1222 (*right*) CRC xenografts, showing adenocarcinoma morphology. (B)  $\beta$ -catenin immunostaining of all xenograft tumor sources used in this study showed strong nuclear accumulation in a subset of tumor cells (arrows), with the majority of cells showing little or no nuclear staining (arrowheads). (C) H&E staining demonstrates preserved glandular morphology of the original freshly resected colon cancer specimens (*left*, frozen sections) after xenografting and growth in NOD/SCID mice (*right*, paraffin sections).

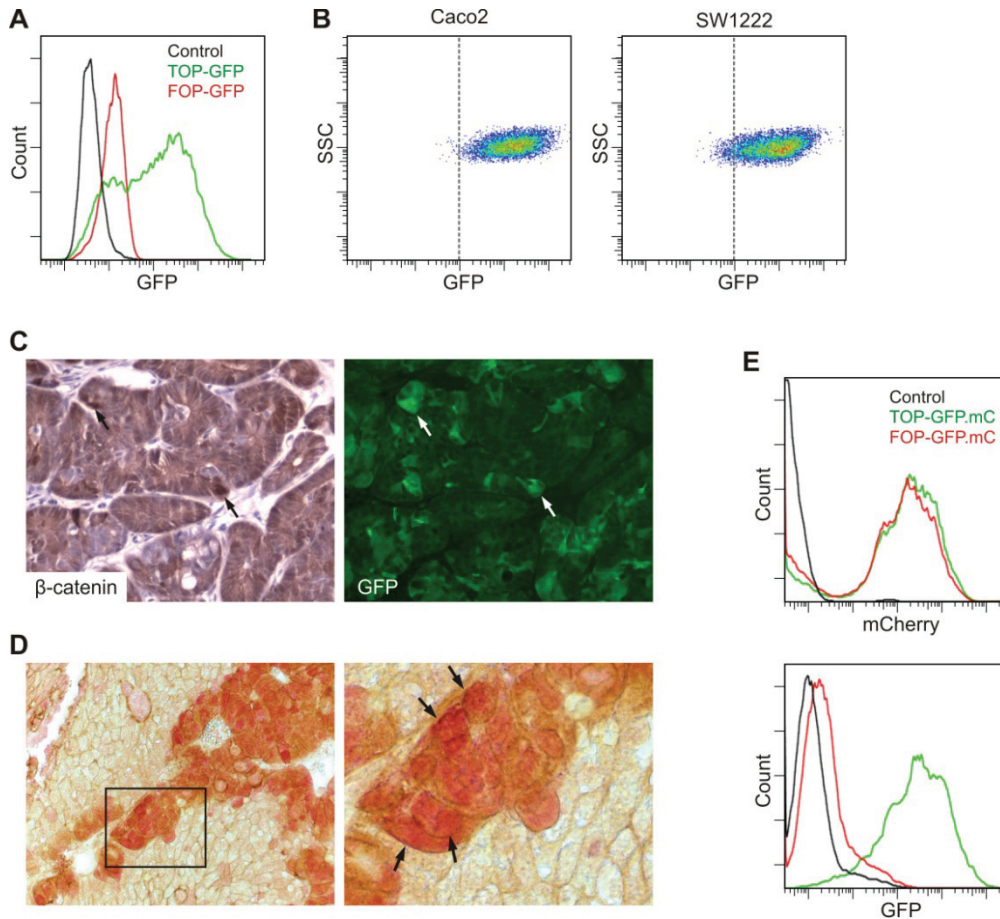

**Supplemental Figure 2.** (A) Specificity of TCF/LEF promoter-based GFP expression from the single color construct TOP-GFP in transduced Caco2 cells. Comparison of GFP fluorescence between non-transduced (Control), TOP-GFP, and FOP-GFP transduced Caco2 cells. (B) FACS analysis of *in vitro* cultured TOP-GFP transduced and single cell cloned Caco2 and SW1222 cells showing predominantly high GFP expression. (C) SW1222<sup>TOP-GFP</sup> xenograft tumor section, stained for  $\beta$ -catenin (*left*) and GFP (*right*) to assess co-localization (arrows) of the 2 proteins. (D) Co-immunostaining for active, dephospho- $\beta$ -Catenin (brown signal) and GFP (red signal) in Caco2<sup>TOP-GFP</sup> tumors reveals co-localization (arrows) of the two signals. *Right image* shows a higher magnification of area boxed in *left image*. (E) Specificity of TCF/LEF promoter-based GFP expression from the two-color construct TOP-GFP.mC. TCF/LEF promoter-independent mCherry fluorescence is present in both TOP-GFP.mC and FOP-GFP.mC transduced Caco2 cells (*top panel*), whereas TCF/LEF promoter-dependent GFP fluorescence is present only after TOP-GFP.mC transduction (*bottom panel*).

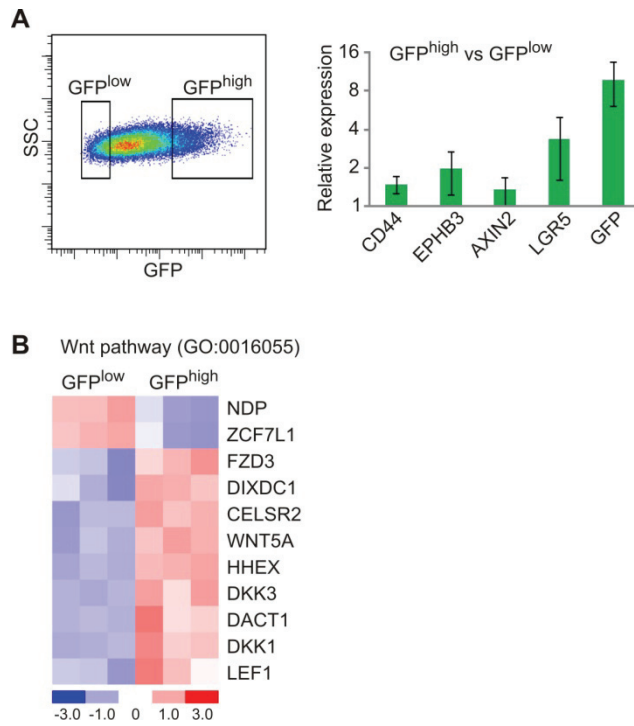

**Supplemental Figure 3.** (A) Flow sorting of disaggregated tumor cell suspensions from SW1222<sup>TOP-GFP</sup> xenografts (*left*) and qRT-PCR expression analysis of a panel of WNT-target genes (*right*). (B) Differentially expressed WNT pathway components in GFP<sup>high</sup> and GFP<sup>low</sup> tumor cells isolated from Caco2<sup>TOP-GFP</sup> xenografts.

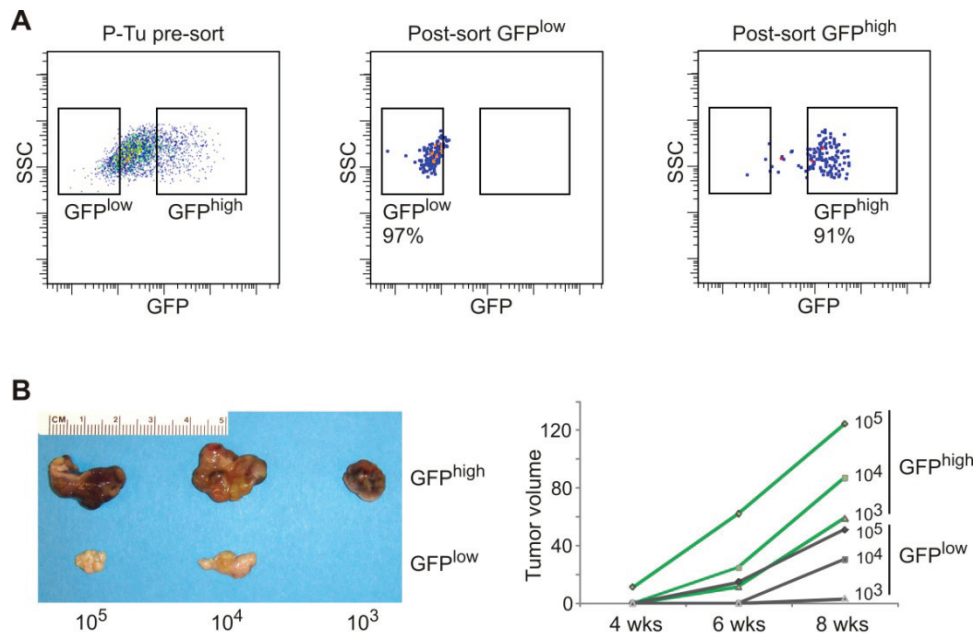

**Supplemental Figure 4.** (A) Purity analyses of FACS sorted tumor cell fractions. *Left panel* shows GFP-fluorescence and gates during sort of a primary tumor (P-Tu). Purities (indicated as percent values) were assessed by immediate post-sort FACS analyses of GFP<sup>low</sup> (*middle panel*) and GFP<sup>high</sup> (*right panel*) cell fractions. (B) Gross appearance of tumors formed in NOD/SCID mice after 8 weeks (*left image*) and volume of tumors formed after 4-8 weeks (wks, *right graph*), following injection of the stated numbers of GFP<sup>high</sup> or GFP<sup>low</sup> cells isolated from Caco2<sup>TOP-GFP</sup> xenografts.



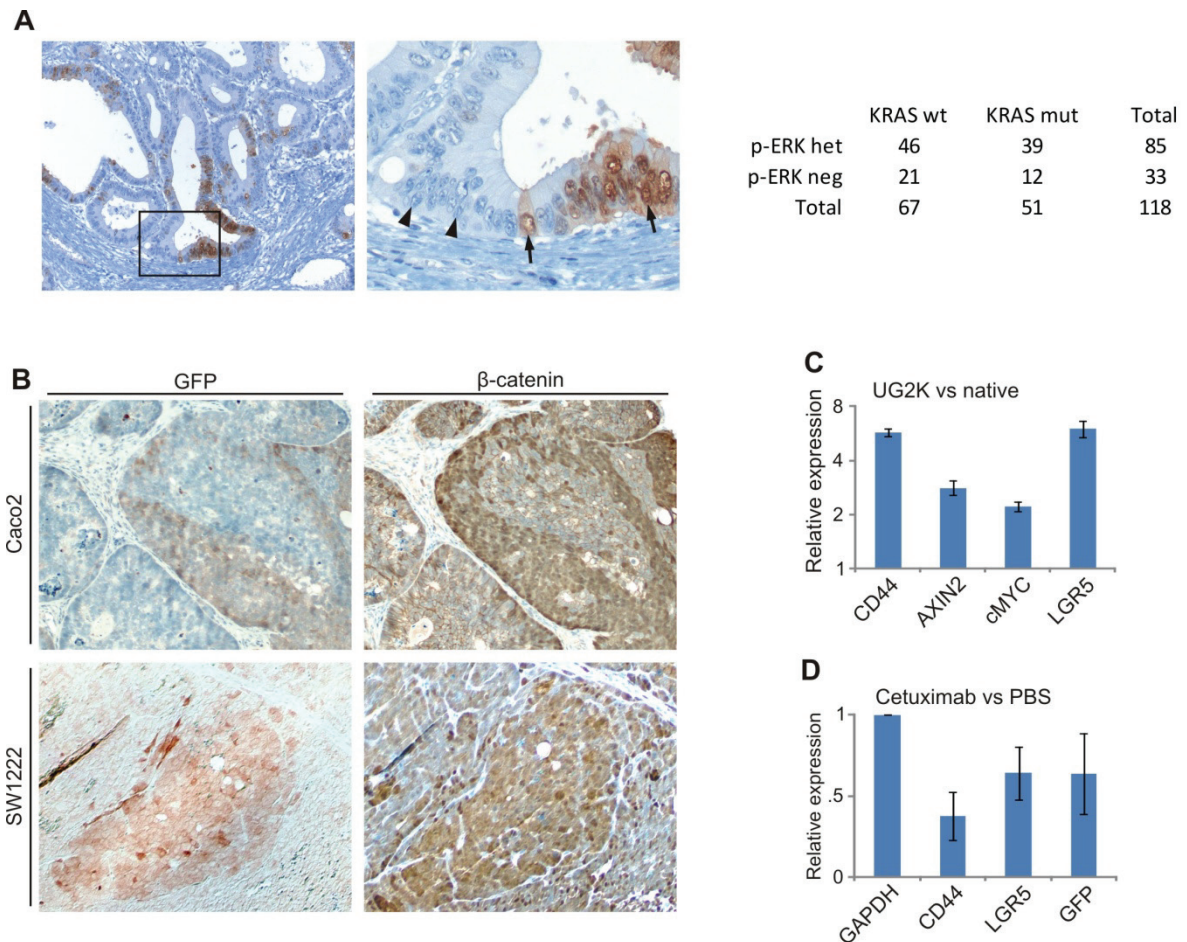

**Suppl. Figure 5.** (A) Immune staining for phospho-ERK in 118 colon cancer specimens reveals heterogeneous MAPK activity, irrespective of KRAS mutation status. In all tumors with detectable phospho-ERK staining, tumor cells with (*arrows*) and without (*arrowheads*) staining were present. *Right image* shows a higher magnification of area boxed in *left image*. *Table* indicates frequencies of non-detectable (*p-ERK neg*) and heterogeneous ERK expression (*p-ERK het*) in colon cancers with (*KRAS mut*) and without (*KRAS wt*) KRAS mutations. (B) Serial sections of mosaic Caco2<sup>UG2K</sup> and SW1222<sup>UG2K</sup> transduced tumors, stained for  $\beta$ -catenin and GFP, showing co-localization of GFP (and hence KRAS<sup>G12V</sup>) expression and nuclear  $\beta$ -catenin. (C) qRT-PCR analysis of expression of a panel of WNT target genes in UG2K transduced Caco2 tumor cells, normalized to non-transduced (native) cells, providing evidence for WNT pathway activation. (D) Cultured Caco2<sup>TOP-GFP</sup> cells were treated with cetuximab or PBS for 5 days. qRT-PCR analysis showed decreased expression of GFP and of the WNT target genes CD44 and LGR5.

**Suppl. Table 1. Gene Expression (real-time RT-PCR) primers used in this study**

Primers were selected from the Universal Probe Library (Roche). TCF1 primers were previously described (Maier et al., 2011).

| <b>Gene</b> | <b>Forward Primer</b>              | <b>Reverse Primer</b>       |
|-------------|------------------------------------|-----------------------------|
| AXIN2       | aggccagtgagttggtgctc               | catcctcccagatctcctca        |
| BMP4        | ctttaccggcttcagtctgg               | tgggatgttctccagatgttc       |
| CD44        | aaggtggagcaaacacaacc               | tccacttggtttctgtcct         |
| cMYC        | cctaccctctcaacgacagc               | ctctgacctttgccaggag         |
| DKK1        | caggcgtgcaaactctgtct               | aatgattttgatcagaagacacacata |
| EPHB3       | cagaagacctgctccgtattgg             | tcacccctctcctaattccatc      |
| GAPDH       | gaaggtgaaggtcggagtc                | gaagatggtgatgggatttc        |
| GFP         | agaacggcatcaaggtgaac               | tgctcaggtagtggtgtcgc        |
| LGR5        | ggaaatcatgccttacagagc              | cctggggaaggtgaacact         |
| mCherry     | ccccgtaatgcagaagaaga               | ttgacctcagcgtcgtagtg        |
| NKD1        | gctgctgggtaaagctcac                | agtgggcttggtctctgct         |
| SP5         | gaagctcaaagtcgctgagg               | caggtccccggatctctc          |
| TCF1        | cgggacagaggaccattacaactagatcaaggag | ccacctgcctcggcctgccaagt     |

**Supplemental Reference**

Maier E, Hebenstreit D, Posselt G, Hammerl P, Duschl A, Horejs-Hoeck J. Inhibition of suppressive T cell factor 1 (TCF-1) isoforms in naive CD4+ T cells is mediated by IL-4/STAT6 signaling. *The Journal of biological chemistry* (2011) 286:919-928.
